# Supplementary material for: On the stability of manganese tris(β-diketonate) complexes as redox mediators in DSSCs
Source: Royal Society of Chemistry journal article supplement (doi:10.1039/c5cp05524e), 2016-01-01
Supplement: c5cp05524e1.pdf [file c5cp05524e1.pdf]

**Supporting Information to**  
**ON THE STABILITY OF MANGANESE *TRIS* ( $\beta$ -DIKETONATE) COMPLEXES AS**  
**REDOX MEDIATORS IN DSSCs.**

Stefano Carli\*, Elisabetta Benazzi, Laura Casarin, Tatiana Bernardi, Valerio Bertolasi, Roberto Argazzi, Stefano Caramori, and Carlo Alberto Bignozzi\*.

(a) Department of Chemical and Pharmaceutical Sciences of the University of Ferrara, Via Fossato di Mortara 17-27, 44121, Ferrara, Italy

(b) CNR-ISOF c/o Department of Chemical and Pharmaceutical Sciences of the University of Ferrara, Via Fossato di Mortara 17-27, 44121, Ferrara, Italy

**Table of Contents**

|                   |            |
|-------------------|------------|
| <b>Table S1a</b>  | <b>S3</b>  |
| <b>Table S1b</b>  | <b>S3</b>  |
| <b>Figure S1</b>  | <b>S4</b>  |
| <b>Figure S2</b>  | <b>S4</b>  |
| <b>Figure S3</b>  | <b>S5</b>  |
| <b>Figure S4</b>  | <b>S5</b>  |
| <b>Figure S5</b>  | <b>S6</b>  |
| <b>Figure S6</b>  | <b>S6</b>  |
| <b>Table S2</b>   | <b>S7</b>  |
| <b>Figure S7</b>  | <b>S7</b>  |
| <b>Table S3</b>   | <b>S8</b>  |
| <b>Figure S8</b>  | <b>S8</b>  |
| <b>Figure S9</b>  | <b>S8</b>  |
| <b>Figure S10</b> | <b>S9</b>  |
| <b>Table S4a</b>  | <b>S9</b>  |
| <b>Table S4b</b>  | <b>S10</b> |
| <b>Table S5a</b>  | <b>S10</b> |

|                                             |            |
|---------------------------------------------|------------|
| <b>Table S5b</b>                            | <b>S11</b> |
| <b>Figure S11</b>                           | <b>S12</b> |
| <b>Figure S12</b>                           | <b>S12</b> |
| <b>Figure S13</b>                           | <b>S13</b> |
| <br>                                        |            |
| <b>References to supporting information</b> | <b>S14</b> |

**Table S1a.** Crystallographic Data for *fac*-[Mn(CF<sub>2</sub>)<sub>3</sub>] (complex **2**).

|                                                          |                                                                      |
|----------------------------------------------------------|----------------------------------------------------------------------|
| Compound                                                 | <i>fac</i> -[Mn(CF <sub>2</sub> ) <sub>3</sub> ] (complex <b>2</b> ) |
| Formula                                                  | Mn(III)C <sub>30</sub> H <sub>21</sub> F <sub>6</sub> O <sub>6</sub> |
| M                                                        | 646.41                                                               |
| Space group                                              | <i>R</i> -3                                                          |
| Crystal system                                           | Trigonal                                                             |
| a/Å                                                      | 18.583(1)                                                            |
| b/Å                                                      | 18.583(1)                                                            |
| c/Å                                                      | 14.503(1)                                                            |
| α/°                                                      | 90.00                                                                |
| β/°                                                      | 90.00                                                                |
| γ/°                                                      | 120.00                                                               |
| U/Å <sup>3</sup>                                         | 4337.3(4)                                                            |
| Z                                                        | 6                                                                    |
| T/K                                                      | 295                                                                  |
| D <sub>c</sub> /g cm <sup>-3</sup>                       | 1.485                                                                |
| F(000)                                                   | 1968                                                                 |
| μ(Mo-Kα)/mm <sup>-1</sup>                                | 0.537                                                                |
| Measured Reflections                                     | 3905                                                                 |
| Unique Reflections                                       | 2071                                                                 |
| R <sub>int</sub>                                         | 0.0210                                                               |
| Obs. Refl.ns [I≥2σ(I)]                                   | 1496                                                                 |
| θ <sub>min</sub> -θ <sub>max</sub> /°                    | 4.39 – 27.00                                                         |
| hkl ranges                                               | -23,23;-20,20;-15,18                                                 |
| R(F <sup>2</sup> ) (Obs.Refl.ns)                         | 0.0505                                                               |
| wR(F <sup>2</sup> ) (All Refl.ns)                        | 0.1513                                                               |
| No. Variables/Restraints                                 | 130/0                                                                |
| Goodness of fit                                          | 1.046                                                                |
| Δρ <sub>max</sub> ; Δρ <sub>min</sub> /e Å <sup>-3</sup> | 0.295; -0.327                                                        |
| CCDC Deposition N.                                       | 1421029                                                              |

**Table S1b.** Selected bond distances and angles (Å and degrees).

| <i>fac</i> -[Mn(CF <sub>2</sub> ) <sub>3</sub> ] (complex <b>2</b> ) |           |
|----------------------------------------------------------------------|-----------|
| <b>Distances</b>                                                     |           |
| Mn1-O1                                                               | 1.978(2)  |
| Mn1-O2                                                               | 1.995(2)  |
| <b>Angles</b>                                                        |           |
| O1-Mn1-O2                                                            | 89.17(8)  |
| O1-Mn1-O1'                                                           | 90.48(8)  |
| O1-Mn1-O2'                                                           | 91.57(9)  |
| O1-Mn1-O2''                                                          | 177.92(8) |
| O2-Mn1-O2'                                                           | 88.79(8)  |
| O2-Mn1-O2''                                                          | 91.57(9)  |

**Figure S1.** ESI mass of  $[\text{Mn}(\text{acac})_3]$  (1)

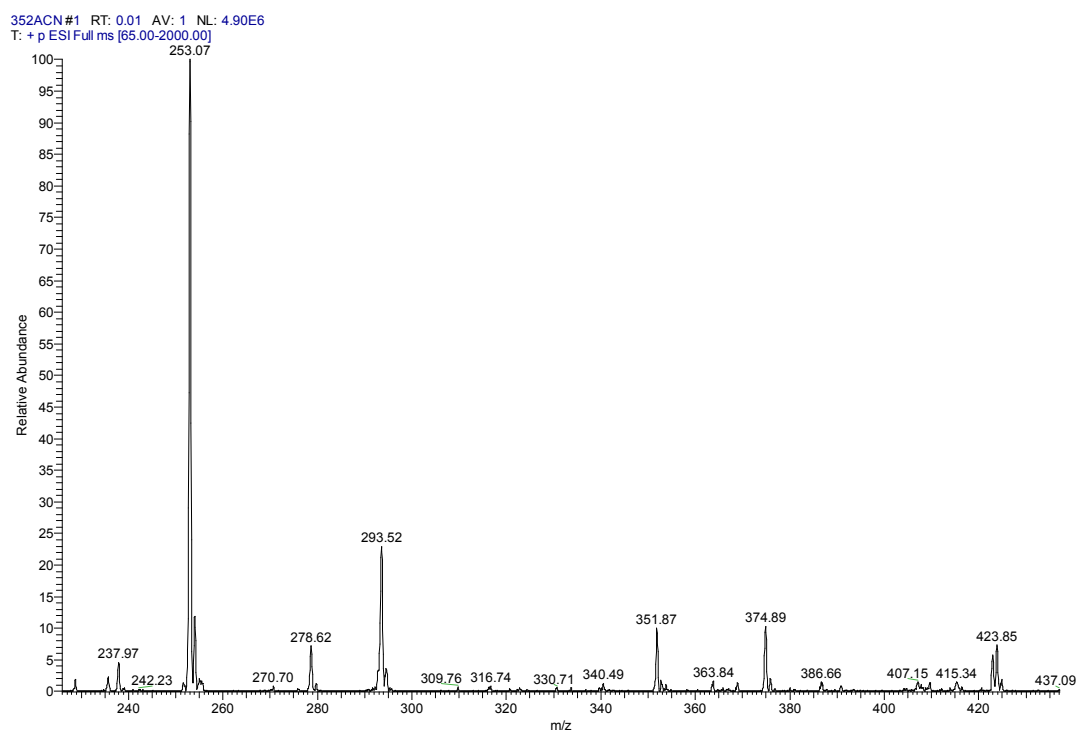

**Figure S2.** ESI mass of  $[\text{Mn}(\text{CF}_2)_3]$  (2).

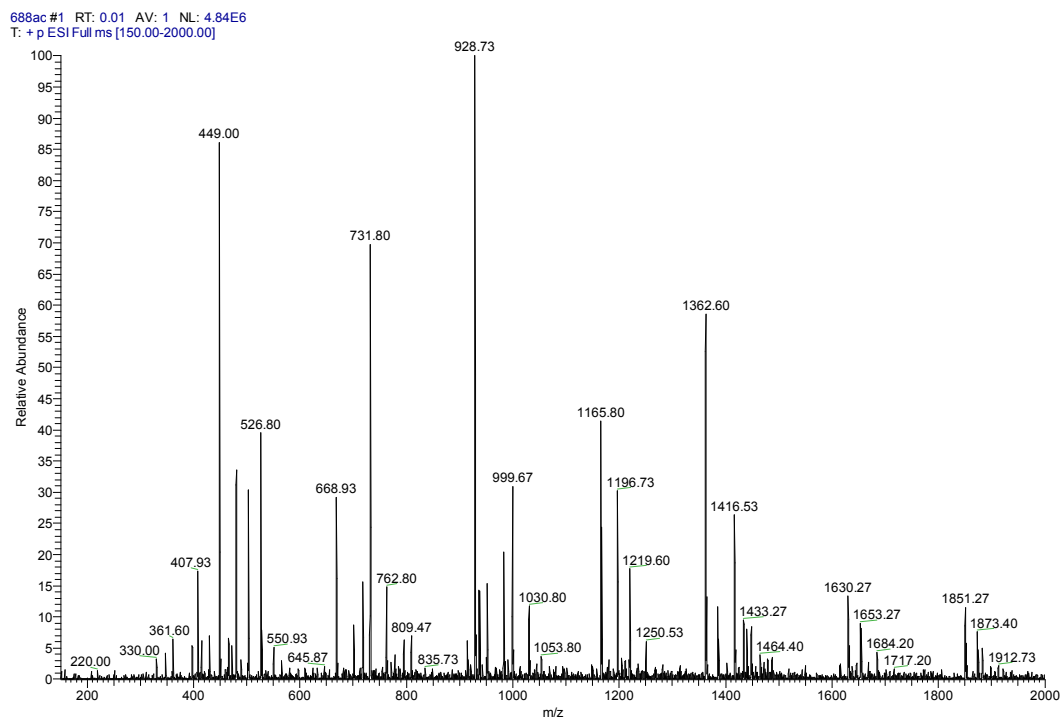

**Figure S3.** ESI mass of  $[\text{Mn}(\text{DBM})_3]$  (**3**).

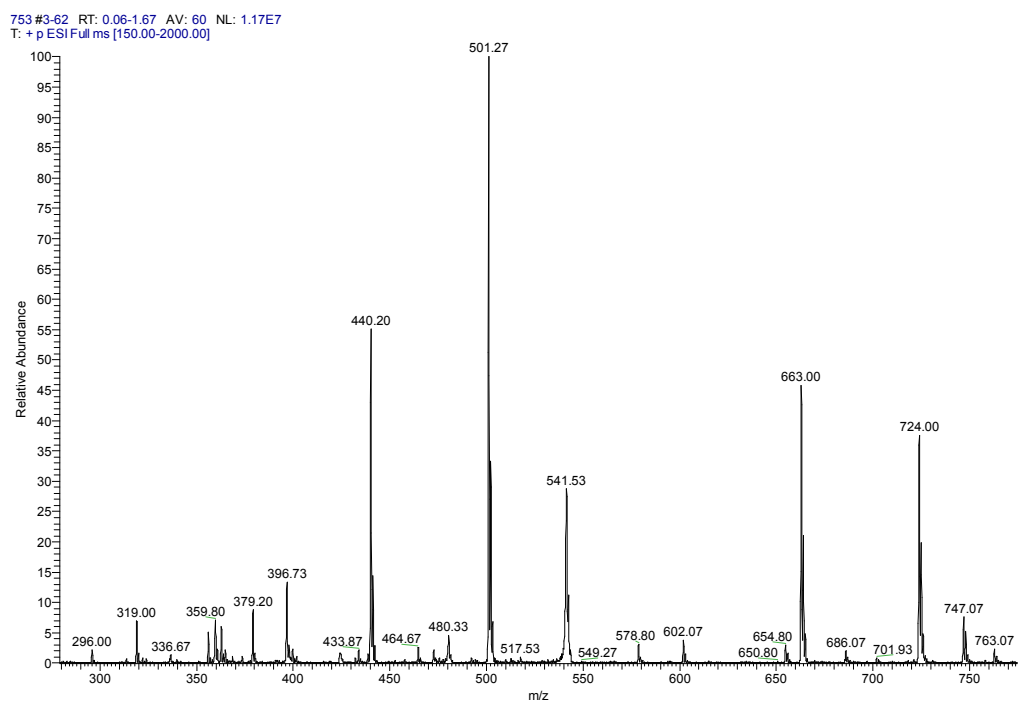

**Figure S4.** ESI of  $[\text{Mn}(\text{CF}_2)_3]\text{TBA}$  (**4**).

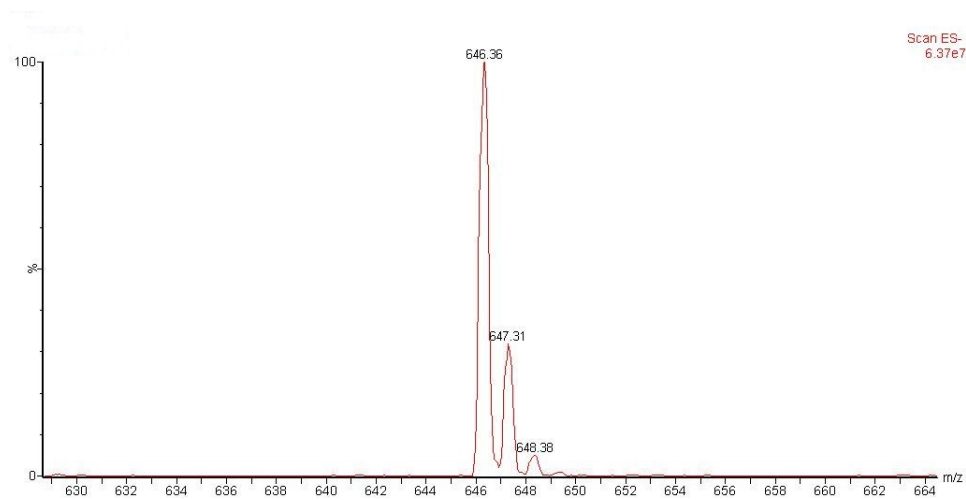

**Figure S5.** ESI of  $[\text{Mn}(\text{DBM})_3]\text{TBA}$  (**5**).

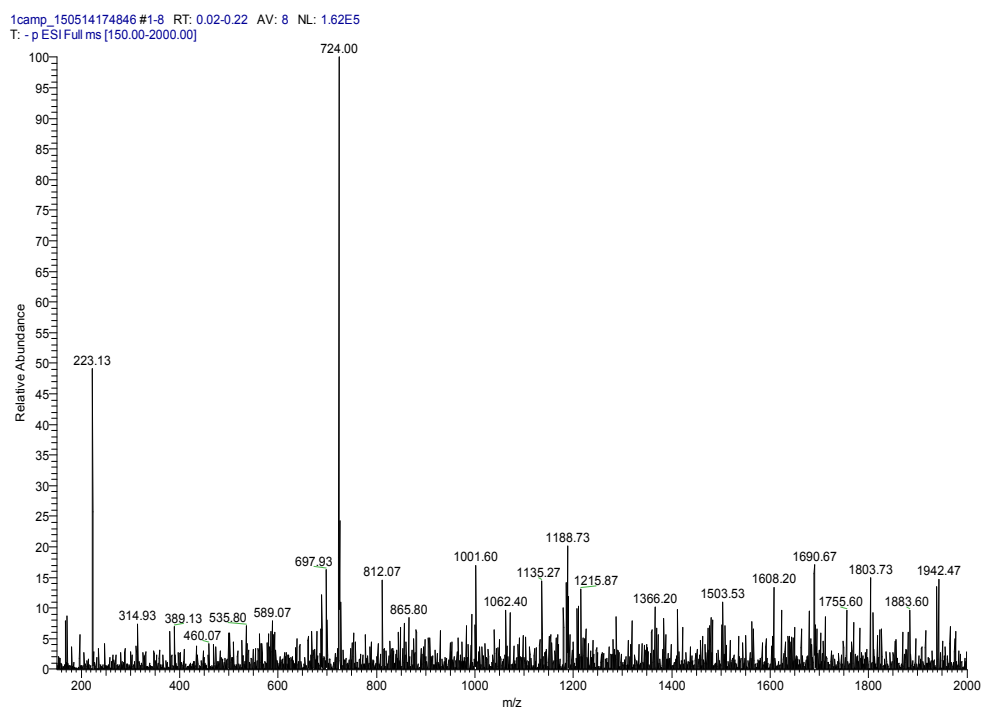

**Figure S6.** Visible spectra of a) **1,2,3** and b) **4,5** complexes.

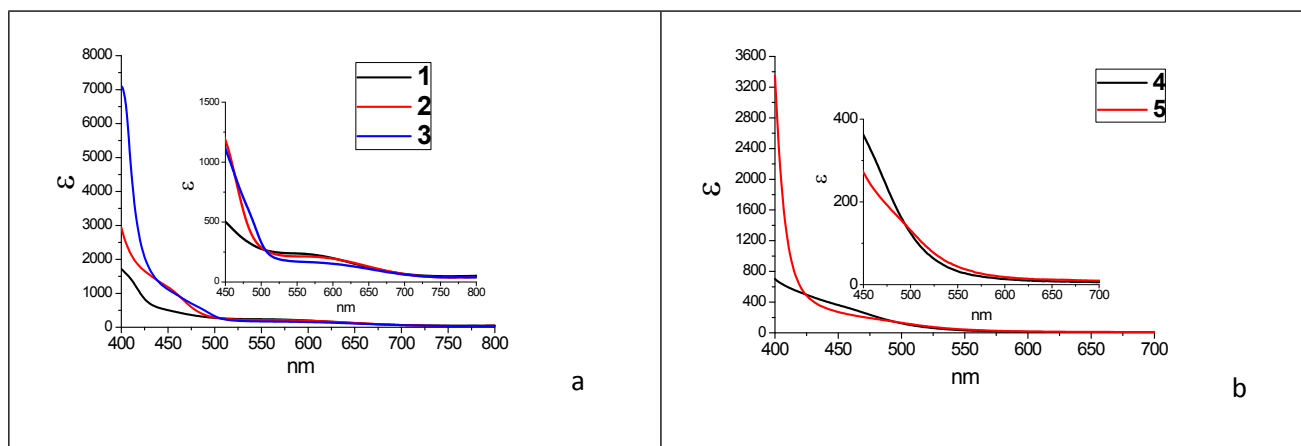

**Table S2.** Relevant photoelectrochemical data obtained from the JV plots reported in Figure 3. Electrolyte composition: 0.15M **1** or **2**, 0.5M TBP, 0.1M LiCF<sub>3</sub>SO<sub>3</sub>, 0.015M NOBF<sub>4</sub> in A) MPN and B) ACN.

| electrolyte | Mn complex                                         | J <sub>sc</sub><br>mA cm <sup>-2</sup> | V <sub>oc</sub><br>V | FF   | η%   |
|-------------|----------------------------------------------------|----------------------------------------|----------------------|------|------|
| A           | [Mn(acac) <sub>3</sub> ]<br><b>(1)</b>             | 4.15                                   | 0.73                 | 0.64 | 1.55 |
|             | [Mn(CF <sub>2</sub> ) <sub>3</sub> ]<br><b>(2)</b> | 3.69                                   | 0.83                 | 0.61 | 1.89 |
| B           | [Mn(acac) <sub>3</sub> ]<br><b>(1)</b>             | 5.69                                   | 0.73                 | 0.57 | 2.36 |
|             | [Mn(CF <sub>2</sub> ) <sub>3</sub> ]<br><b>(2)</b> | 4.95                                   | 0.80                 | 0.69 | 2.72 |

**Figure S7.** JV of MK2 sensitized DSSC based on [Mn(acac)<sub>3</sub>] **(1)**. Electrolyte: 0.50 M **1**, 0.10M NOBF<sub>4</sub>, 1.20 M TBP, 0.05M LiCF<sub>3</sub>SO<sub>3</sub> in ACN.

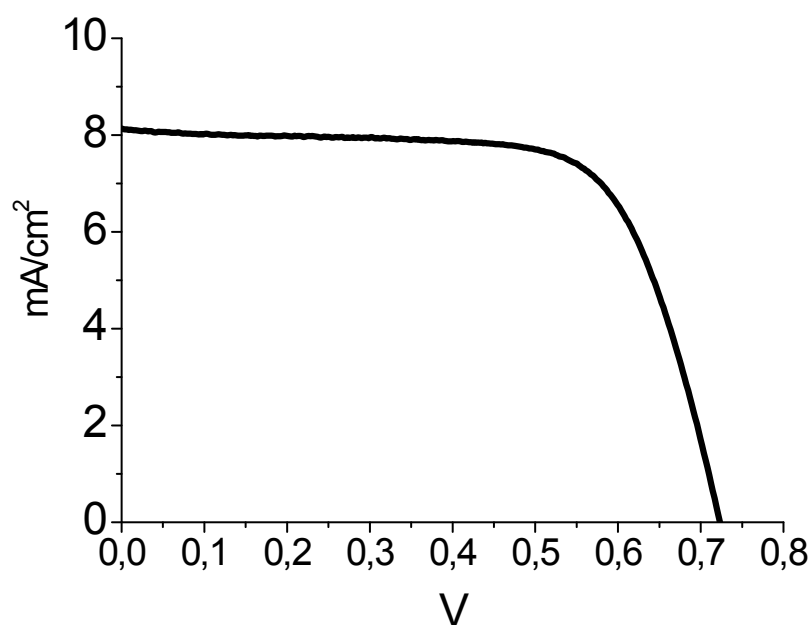

**Table S3.** Relevant parameters obtained from JV analysis of plot reported in Figure S10 and a comparison with reported data.<sup>1</sup>

|            | <b>Jsc</b><br>mA cm <sup>-2</sup> | <b>Voc</b><br>V | <b>FF</b> | <b>PCE</b><br>% |
|------------|-----------------------------------|-----------------|-----------|-----------------|
| this paper | 8,1                               | 0,73            | 0,69      | 4               |
| Ref.1      | 8,6                               | 0.73            | 0.69      | 4.4             |

**Figure S8:** CV of MK2 in 0.1N LiOCl<sub>4</sub>/ACN solution at scan rate 100 mV sec<sup>-1</sup>, WE glassy carbon, CE Pt wire.

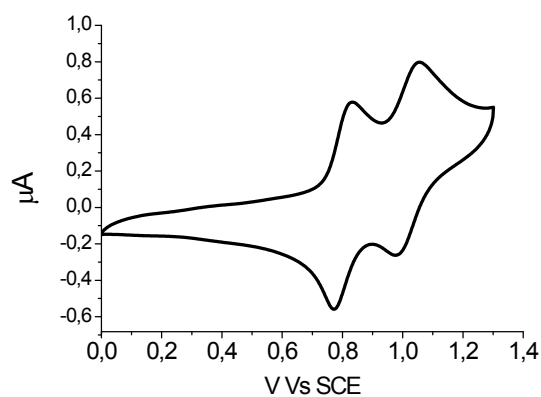

**Figure S9:** Spectral changes of a 0.15M [Mn(acac)<sub>3</sub>] (**1**) solution in 0.1N LiClO<sub>4</sub>/ACN upon 0.5M TBP addition after 24 hr and 48 hr.

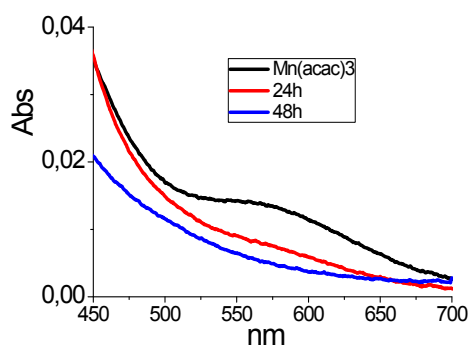



**Figure S10.** ESI mass of 0.15M [Mn(acac)<sub>3</sub>] (**1**) based electrolyte after the addition of 0.5M TBP A) immediately B) after 24 hours.

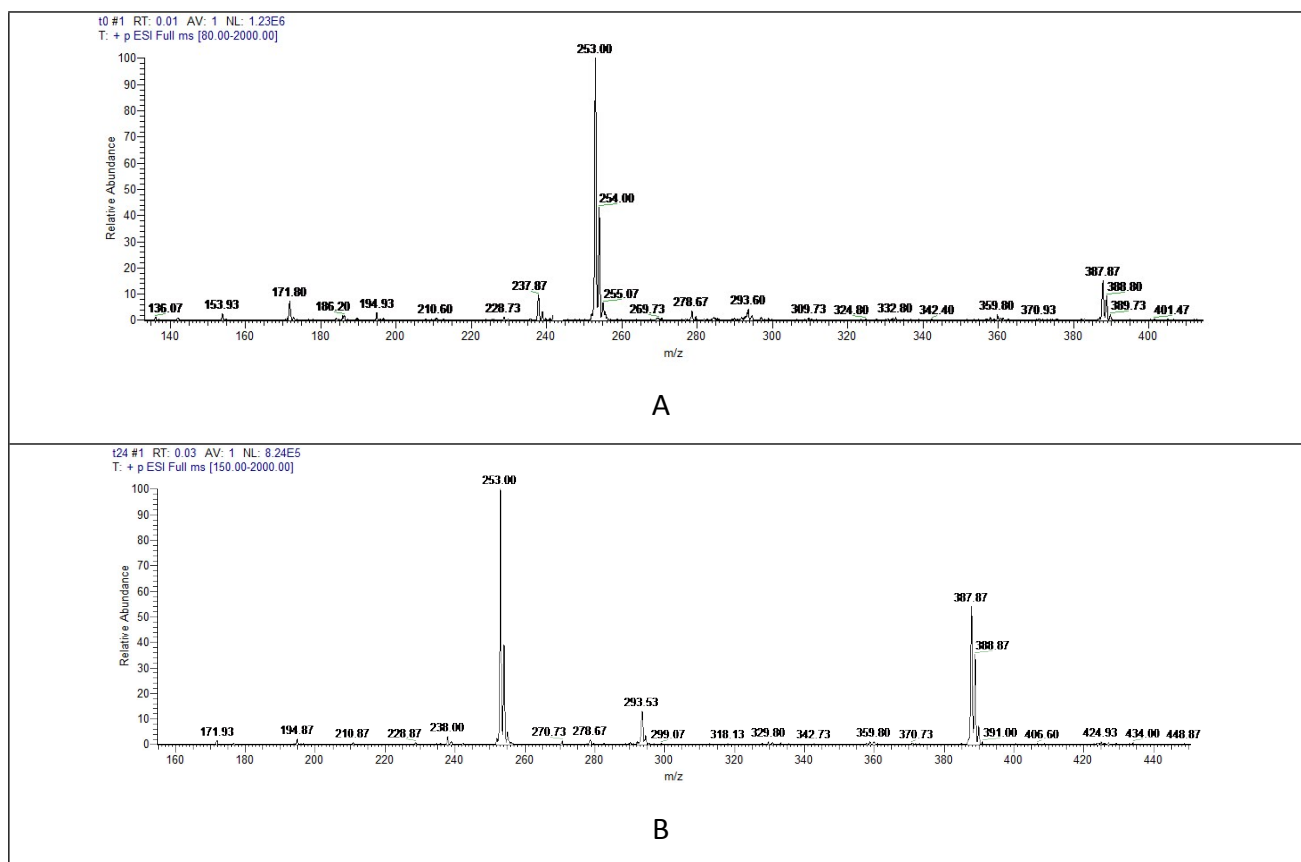

**Table S4a.** Crystallographic Data for *trans*-[Mn<sup>III</sup>(acac)<sub>2</sub>TBP<sub>2</sub>][ClO<sub>4</sub>].

|                                       |                                                                                                                        |
|---------------------------------------|------------------------------------------------------------------------------------------------------------------------|
| Compound                              | <i>trans</i> -[Mn <sup>III</sup> (acac) <sub>2</sub> TBP <sub>2</sub> ][ClO <sub>4</sub> ]                             |
| Formula                               | [Mn(III)C <sub>28</sub> H <sub>40</sub> N <sub>2</sub> O <sub>8</sub> ] <sup>+</sup> •[ClO <sub>4</sub> ] <sup>-</sup> |
| M                                     | 623.01                                                                                                                 |
| Space group                           | <i>C2/c</i>                                                                                                            |
| Crystal system                        | Monoclinic                                                                                                             |
| a/Å                                   | 16.325(1)                                                                                                              |
| b/Å                                   | 17.663(1)                                                                                                              |
| c/Å                                   | 12.491(1)                                                                                                              |
| α/°                                   | 90.00                                                                                                                  |
| β/°                                   | 115.434(10)                                                                                                            |
| γ/°                                   | 90.00                                                                                                                  |
| U/Å <sup>3</sup>                      | 3252.7(4)                                                                                                              |
| Z                                     | 4                                                                                                                      |
| T/K                                   | 295                                                                                                                    |
| D <sub>c</sub> /g cm <sup>-3</sup>    | 1.272                                                                                                                  |
| F(000)                                | 1312                                                                                                                   |
| μ(Mo-Kα)/mm <sup>-1</sup>             | 0.534                                                                                                                  |
| Measured Reflections                  | 5347                                                                                                                   |
| Unique Reflections                    | 2838                                                                                                                   |
| R <sub>int</sub>                      | 0.0785                                                                                                                 |
| Obs. Refl.ns [I≥2σ(I)]                | 1742                                                                                                                   |
| θ <sub>min</sub> -θ <sub>max</sub> /° | 3.26-25.00                                                                                                             |
| hkl ranges                            | -19,19;-20,20;-14,14                                                                                                   |

|                                                             |               |
|-------------------------------------------------------------|---------------|
| R(F <sup>2</sup> ) (Obs.Refl.ns)                            | 0.0841        |
| wR(F <sup>2</sup> ) (All Refl.ns)                           | 0.2813        |
| No. Variables/Restraints                                    | 220/21        |
| Goodness of fit                                             | 1.034         |
| $\Delta\rho_{\max}; \Delta\rho_{\min} / e \text{ \AA}^{-3}$ | 0.519; -0.513 |
| CCDC Deposition N.                                          | 1421030       |

**Table S4b.** Selected bond distances and angles (Å and degrees).

| <i>trans</i> -[Mn <sup>III</sup> (acac) <sub>2</sub> TBP <sub>2</sub> ]ClO <sub>4</sub> |           |
|-----------------------------------------------------------------------------------------|-----------|
| <b>Distances</b>                                                                        |           |
| Mn1-O1                                                                                  | 1.924(3)  |
| Mn1-O2                                                                                  | 1.915(4)  |
| Mn1-N1                                                                                  | 2.290(4)  |
| <b>Angles</b>                                                                           |           |
| O1-Mn1-O2                                                                               | 92.24(16) |
| O1-Mn1-O1'                                                                              | 180.00    |
| O1-Mn1-O2'                                                                              | 87.76(16) |
| O2-Mn1-O2'                                                                              | 180.00    |
| O1-Mn1-N1                                                                               | 89.15(16) |
| O1-Mn1-N1'                                                                              | 90.85(16) |
| O2-Mn1-N1                                                                               | 90.60(16) |
| O2-Mn1-N1'                                                                              | 89.40(16) |
| N1-Mn1-N1'                                                                              | 180.00    |

**Table S5a.** Crystallographic Data for *trans*-[Mn<sup>II</sup>(CF<sub>2</sub>)<sub>3</sub>TBP<sub>2</sub>]<sup>0</sup>.

|                                          |                                                                                                 |
|------------------------------------------|-------------------------------------------------------------------------------------------------|
| Compound                                 | <i>trans</i> -[Mn <sup>II</sup> (CF <sub>2</sub> ) <sub>3</sub> TBP <sub>2</sub> ] <sup>0</sup> |
| Formula                                  | Mn(II)C <sub>38</sub> H <sub>40</sub> F <sub>4</sub> N <sub>2</sub> O <sub>4</sub>              |
| M                                        | 719.66                                                                                          |
| Space group                              | C2/c                                                                                            |
| Crystal system                           | Monoclinic                                                                                      |
| a/Å                                      | 18.2229(9)                                                                                      |
| b/Å                                      | 19.0407(10)                                                                                     |
| c/Å                                      | 11.7031(7)                                                                                      |
| $\alpha/^\circ$                          | 90.00                                                                                           |
| $\beta/^\circ$                           | 115.785(2)                                                                                      |
| $\gamma/^\circ$                          | 90.00                                                                                           |
| U/Å <sup>3</sup>                         | 3656.4(3)                                                                                       |
| Z                                        | 4                                                                                               |
| T/K                                      | 295                                                                                             |
| D <sub>c</sub> /g cm <sup>-3</sup>       | 1.307                                                                                           |
| F(000)                                   | 1500                                                                                            |
| $\mu$ (Mo-K $\alpha$ )/mm <sup>-1</sup>  | 0.422                                                                                           |
| Measured Reflections                     | 5464                                                                                            |
| Unique Reflections                       | 3172                                                                                            |
| R <sub>int</sub>                         | 0.0265                                                                                          |
| Obs. Refl.ns [I $\geq$ 2 $\sigma$ (I)]   | 2230                                                                                            |
| $\theta_{\min}$ - $\theta_{\max}/^\circ$ | 3.53– 25.00                                                                                     |

|                                                              |                      |
|--------------------------------------------------------------|----------------------|
| hkl ranges                                                   | -21,21;-21,22;-13,13 |
| R(F <sup>2</sup> ) (Obs.Refl.ns)                             | 0.0750               |
| wR(F <sup>2</sup> ) (All Refl.ns)                            | 0.2310               |
| No. Variables/Restraints                                     | 239/19               |
| Goodness of fit                                              | 1.129                |
| $\Delta\rho_{\max}$ ; $\Delta\rho_{\min}$ /e Å <sup>-3</sup> | 0.400; -0.384        |
| CCDC Deposition N.                                           | 1421031              |

**Table S5b.** Selected bond distances and angles (Å and degrees).

| <i>trans</i> -[Mn <sup>II</sup> (CF <sub>2</sub> ) <sub>3</sub> TBP <sub>2</sub> ] <sup>0</sup> |            |
|-------------------------------------------------------------------------------------------------|------------|
| <b>Distances</b>                                                                                |            |
| Mn1-O1                                                                                          | 2.156(4)   |
| Mn1-O2                                                                                          | 2.128(2)   |
| Mn1-N1                                                                                          | 2.271(6)   |
| Mn1-N2                                                                                          | 2.325(6)   |
| <b>Angles</b>                                                                                   |            |
| O1-Mn1-O2                                                                                       | 85.34(11)  |
| O1-Mn1-O1'                                                                                      | 177.09(18) |
| O1-Mn1-O2'                                                                                      | 94.69(11)  |
| O2-Mn1-O2'                                                                                      | 178.96(16) |
| O1-Mn1-N1                                                                                       | 91.45(9)   |
| O1-Mn1-N2                                                                                       | 88.55(9)   |
| O2-Mn1-N1                                                                                       | 89.48(8)   |
| O2-Mn1-N2                                                                                       | 90.52(8)   |
| N1-Mn1-N2                                                                                       | 180.00     |

**Figure S11.** ESI mass of 0.15M [Mn(DBM)<sub>3</sub>] based electrolyte in DMF after the addition of 0.5M TBP after 24 hours.

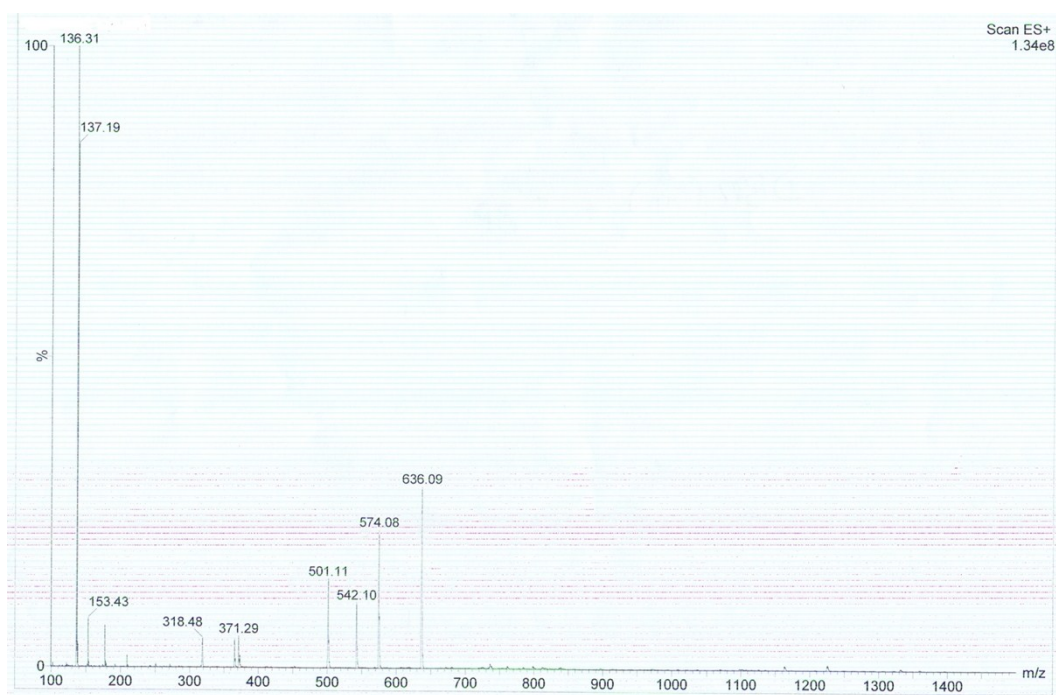

**Figure S12.** Z907/APTS sensitized DSC, electrolyte composition: A)  $[\text{Mn}^{\text{III}}(\text{CF}_2)_3]^0$  (**2**) 0.15M 0.1M  $\text{LiCF}_3\text{SO}_3$ , ACN; B)  $[\text{Mn}^{\text{III}}(\text{DBM})_3]^0$  (**3**) 0.13M, 0.1M  $\text{LiCF}_3\text{SO}_3$ , DMF.

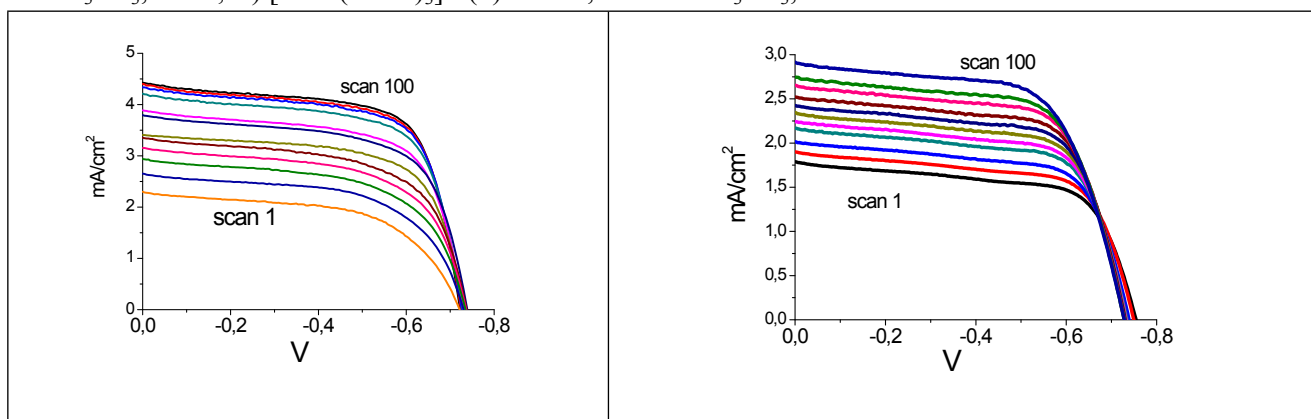

**Figure S13.** Nyquist plots for Z907 sensitized DSC, post treated with APTS and assembled with PEDOT coated counter electrodes based on: A) 0.3/0.03M  $[\text{Mn}^{\text{II/III}}(\text{CF}_2)_3]^{-1/0}$  (**4**) in ACN + 0.1 M  $\text{LiCF}_3\text{SO}_3$ ; B) 0.3/0.03M  $[\text{Mn}^{\text{II/III}}(\text{DBM})_3]^{-1/0}$  (**5**) in ACN/DMF 1/1 + 0.1 M  $\text{LiCF}_3\text{SO}_3$ . AM 1.5G illumination. Circles

indicate experimental data points, continuous lines of the same color are fits to the relevant experimental data.

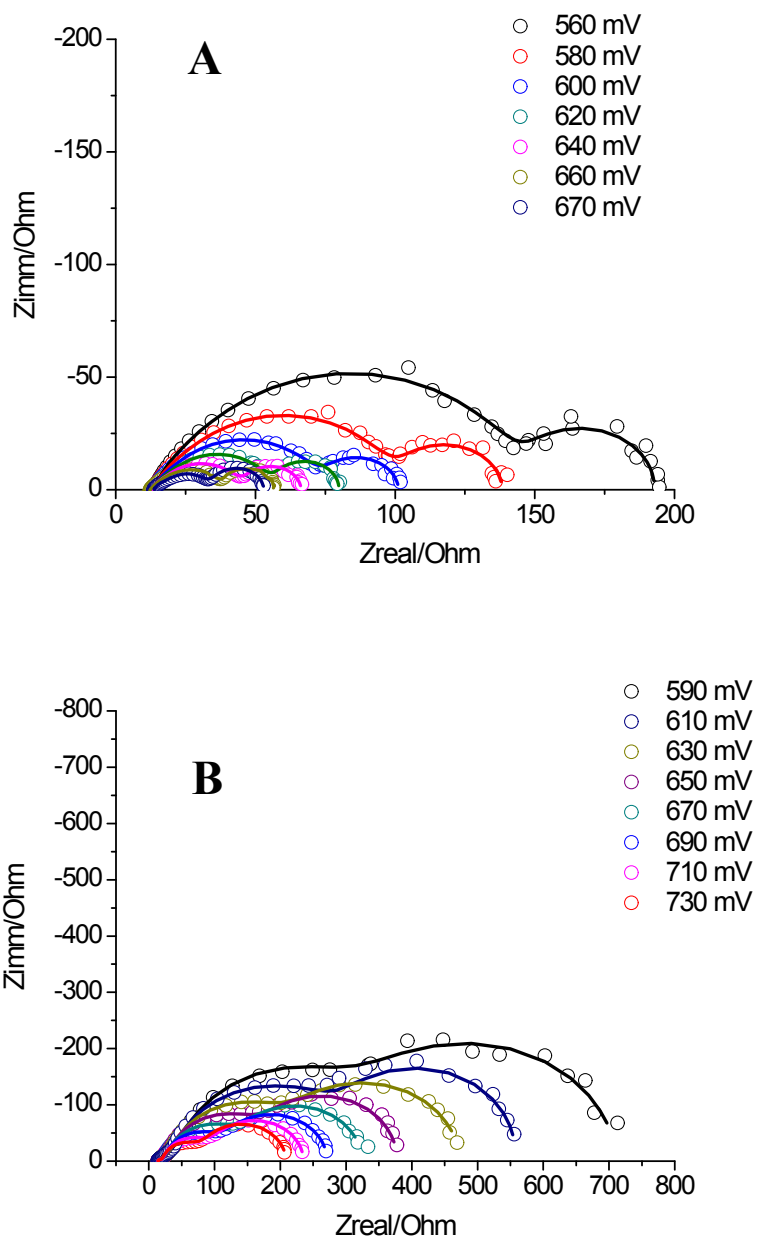

### References to Supporting Information

(1) Perera, I. R.; Gupta, A.; Xiang, W.; Daeneke, T.; Bach, U.; Evans, R. A.; Ohlin, C. A.; Spiccia, L. *Phys. Chem. Chem. Phys.* **2014**, *16*, 12021.
